# Supplementary material for: Factors influencing fast ion transport in glyme-based electrolytes for rechargeable lithium–air batteries
Source: Royal Society of Chemistry journal article supplement (doi:10.1039/c7ra07501d), 2017-01-01
Supplement: c7ra07501d1.pdf [file c7ra07501d1.pdf]

## [Supporting Information]

# Factors Influencing Fast Ion Transport in Glyme-based Electrolytes for Lithium–Air Batteries

Morihiro Saito,<sup>\*,a</sup> Shinya Yamada,<sup>a</sup> Taro Ishikawa,<sup>a</sup> Hiromi Otsuka,<sup>b</sup> Kimihiko Ito,<sup>b</sup> and Yoshimi Kubo<sup>b</sup>

<sup>a</sup> *Department of Applied Chemistry, Faculty of Engineering, Tokyo University of Agriculture & Technology, 2-24-16 Naka-cho, Koganei-shi, Tokyo 184-8588, Japan*  
*E-mail: mosaito@cc.tuat.ac.jp; Tel/Fax: +81-42-388-7095*

<sup>b</sup> *GREEN, National Institute for Materials Science (NIMS), 1-1 Namiki, Tsukuba 305-044, Japan.*

**Table S1.** Self-diffusion coefficients  $D$  of ions and G4 solvent and transference number of cations  $t_{\text{Li}^+}$  at each measured temperature

| Electrolyte         |       | Self-diffusion coefficient / $10^{-10} \text{ m}^2 \text{ s}^{-1}$ |                   |                    | Transference      |
|---------------------|-------|--------------------------------------------------------------------|-------------------|--------------------|-------------------|
|                     |       | $D_{\text{G4}}$                                                    | $D_{\text{Li}^+}$ | $D_{\text{anion}}$ | number of cation  |
|                     |       |                                                                    |                   |                    | $t_{\text{Li}^+}$ |
| 1.0 M<br>LiOTf/G4   | 333 K | 3.4                                                                | 2.1               | 2.2                | 0.49              |
|                     | 323 K | 2.6                                                                | 1.5               | 1.6                | 0.48              |
|                     | 313 K | 1.9                                                                | 1.1               | 1.2                | 0.48              |
|                     | 303 K | 1.4                                                                | 8.0               | 0.84               | 0.49              |
| 1.0 M<br>LiTFSI/G4  | 333 K | 2.5                                                                | 1.9               | 2.0                | 0.49              |
|                     | 323 K | 2.0                                                                | 1.4               | 1.6                | 0.47              |
|                     | 313 K | 1.5                                                                | 1.0               | 1.2                | 0.46              |
|                     | 303 K | 1.1                                                                | 0.70              | 0.88               | 0.44              |
| 1.0 M<br>LiFSI/G4   | 333 K | 2.7                                                                | 1.8               | 2.6                | 0.41              |
|                     | 323 K | 2.2                                                                | 1.4               | 1.8                | 0.44              |
|                     | 313 K | 1.6                                                                | 1.0               | 1.3                | 0.44              |
|                     | 303 K | 1.2                                                                | 0.73              | 0.97               | 0.43              |
| 0.50 M<br>LiTFSI/G4 | 333 K | 4.3                                                                | 3.1               | 3.1                | 0.50              |
|                     | 323 K | 3.4                                                                | 2.2               | 2.6                | 0.46              |
|                     | 313 K | 2.7                                                                | 1.6               | 1.9                | 0.46              |
|                     | 303 K | 1.9                                                                | 1.1               | 1.3                | 0.46              |
| 2.0 M<br>LiTFSI/G4  | 333 K | 0.83                                                               | 0.79              | 0.81               | 0.49              |
|                     | 323 K | 0.59                                                               | 0.53              | 0.59               | 0.47              |
|                     | 313 K | 0.40                                                               | 0.35              | 0.40               | 0.47              |
|                     | 303 K | 0.26                                                               | 0.22              | 0.25               | 0.47              |
| 2.7 M<br>LiTFSI/G4  | 333 K | 0.42                                                               | 0.43              | 0.43               | 0.50              |
|                     | 323 K | 0.30                                                               | 0.30              | 0.30               | 0.50              |
|                     | 313 K | 0.19                                                               | 0.20              | 0.19               | 0.51              |
|                     | 303 K | 0.12                                                               | 0.12              | 0.12               | 0.50              |

**Table S2.** Viscosity  $\eta$  of G4-based electrolytes at each measured temperature

| Electrolyte |       | Viscosity<br>$\eta$ / mPas | Inverse of viscosity<br>$\eta^{-1}$ / mPas <sup>-1</sup> |
|-------------|-------|----------------------------|----------------------------------------------------------|
|             | 333 K | 3.6                        | 0.28                                                     |
| 1.0 M       | 323 K | 4.5                        | 0.22                                                     |
| LiOTf/G4    | 313 K | 5.7                        | 0.18                                                     |
|             | 303 K | 7.4 <sub>5</sub>           | 0.13                                                     |
|             | 333 K | 4.6                        | 0.22                                                     |
| 1.0 M       | 323 K | 5.7                        | 0.17                                                     |
| LiTFSI/G4   | 313 K | 7.5                        | 0.13                                                     |
|             | 303 K | 10                         | 0.10                                                     |
|             | 333 K | 4.4                        | 0.23                                                     |
| 1.0 M       | 323 K | 5.5 <sub>5</sub>           | 0.18                                                     |
| LiFSI/G4    | 313 K | 7.2                        | 0.14                                                     |
|             | 303 K | 9.6                        | 0.10                                                     |
|             | 333 K | 2.7                        | 0.37                                                     |
| 0.50 M      | 323 K | 3.3                        | 0.30                                                     |
| LiTFSI/G4   | 313 K | 4.1                        | 0.24                                                     |
|             | 303 K | 5.2                        | 0.19                                                     |
|             | 333 K | 13                         | 0.075                                                    |
| 2.0 M       | 323 K | 18.5                       | 0.054                                                    |
| LiTFSI/G4   | 313 K | 26.5                       | 0.038                                                    |
|             | 303 K | 41                         | 0.025                                                    |
|             | 333 K | 25                         | 0.039 <sub>5</sub>                                       |
| 2.7 M       | 323 K | 35                         | 0.028                                                    |
| LiTFSI/G4   | 313 K | 53                         | 0.019                                                    |
|             | 303 K | 85                         | 0.012                                                    |

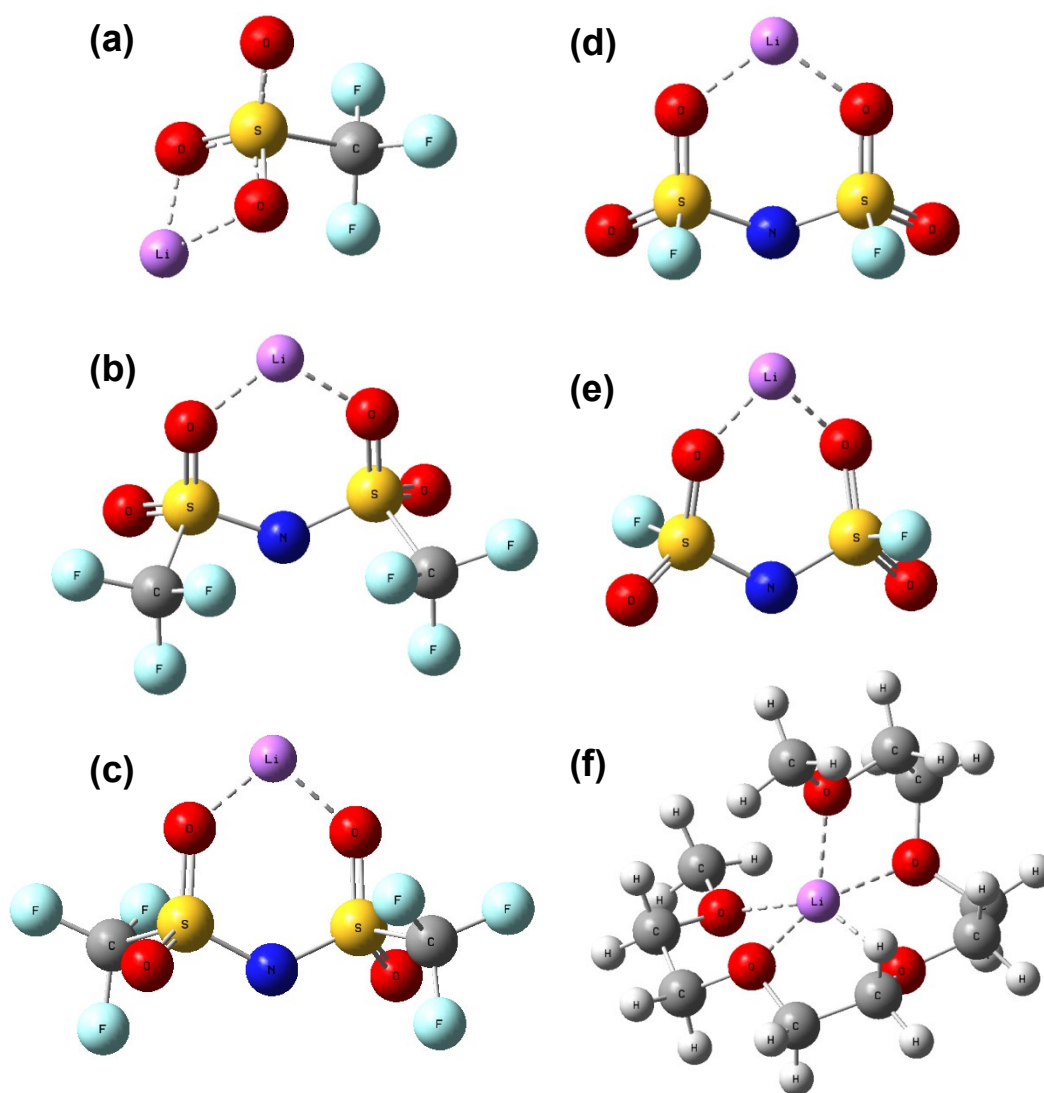

**Fig. S1.** Optimized geometries of the  $\text{Li}^+$ -anion and  $\text{G4-Li}^+$  complexes. (a)  $\text{Li}^+$ - $\text{OTf}^-$ , (b) cis-type  $\text{Li}^+$ - $\text{TFSI}^-$ , (c) trans-type  $\text{Li}^+$ - $\text{TFSI}^-$ , (d) cis-type  $\text{Li}^+$ - $\text{FSI}^-$ , (e) trans-type  $\text{Li}^+$ - $\text{FSI}^-$ , and (f)  $\text{G4-Li}^+$  (5 coordination). B3LYP/6-311+G\*\*.
